# Supplementary material for: Conversion of Furfuryl Alcohol into Ethyl Levulinate over Glucose-Derived Carbon-Based Solid Acid in Ethanol
Source: MDPI journal article supplement (doi:10.3390/molecules24101881), 2019-05-16
Supplement: s1 [file s1]

## Supplementary Materials

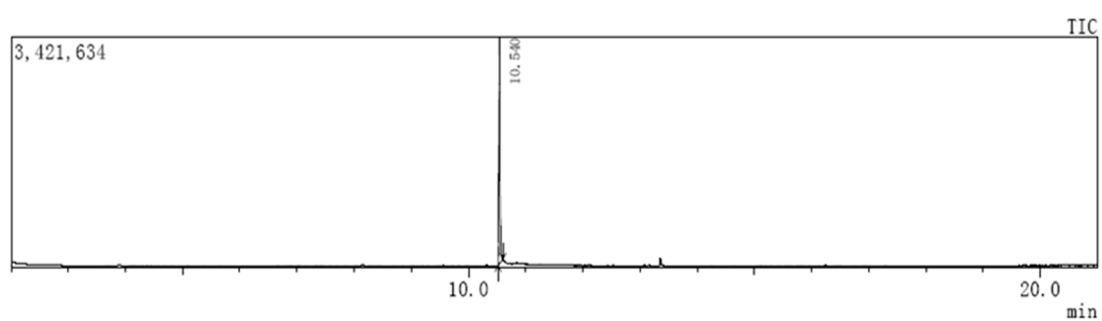

**Figure S1.** GC spectra of the product of the conversion of FA into EL.

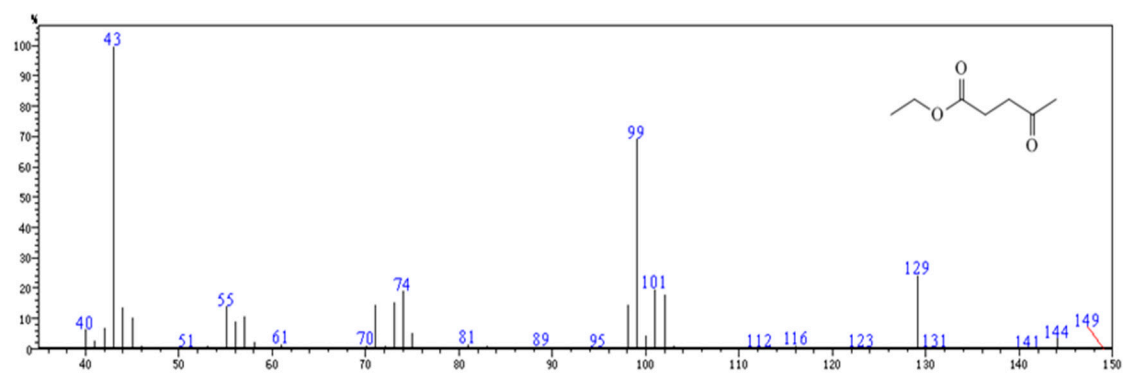

**Figure S2.** MS spectra of the product of the conversion of FA into EL
